# Supplementary material for: Gender disparity in the survival of patients with primary myelodysplastic syndrome
Source: PubMed Central journal article supplement — J Cancer. 2019 Jan 30;10(5):1325–32. doi: 10.7150/jca.28220 (PMC6400681; doi:10.7150/jca.28220), 2019-01-30
Supplement: jcav10p1325s1.pdf [file jcav10p1325s1.pdf]

**Supplementary table 1.** The influence of gender on overall survival of non-American MDS patients

| Country | Total cases | incidence cases (%) |            | Overall survival (time) %     |                        | Multivariate analysis |         |
|---------|-------------|---------------------|------------|-------------------------------|------------------------|-----------------------|---------|
|         |             | Male                | Female     | Male                          | Female                 | HR (95% CI)           | P-value |
| Korea   | 107         | 67 (62.6)           | 40 (37.4)  | (2-y) 52.3                    | (2-y) 78.6             | 3.7 (1.63-8.36) §     | 0.002   |
| Japan   | 186         | 119 (64.0)          | 67 (36.0)  | (5-y) 40                      | (5-y) 58               | 1.96 (1.13-3.43) §    | 0.017   |
| Sweden  | 1329        | 776 (58.0)          | 553 (42)   | (28-m) 27.2                   | (28-m) 28.9            | 0.79 (0.66-0.94) *    | <0.001  |
| Italy   | 467         | 288 (61.7)          | 179 (38.3) | NOP #                         | NOP                    | 0.62 NOP *            | 0.006   |
| Spain   | 370         | 207 (56)            | 163 (44)   | Univariate analysis: P=0.0016 |                        | NOP                   | NOP     |
|         |             |                     |            | (end of follow up) 11%        | (end of follow up) 22% |                       |         |

§Female as reference; \* Male as reference; # not otherwise provided
